# Supplementary material
Source: publisher figshare collection journal article supplement (https://future-science-group.figshare.com/articles/dataset/_/23708124)
Supplement: Supplementary file 1 [file 1]

**SUPPLEMANTARY FILE**

| **ROLE OF EXCIPIENTS** |
| --- |
| **Assists in the production of the drug delivery system throughout manufacturing.** |
| **Safeguard, promote, or improve stability, bioavailability, or acceptability among patients** |
| **Aids in goods recognization and improve any aspect of safety as a whole** |
| **Helps in retaining the product's integrity during storage.** |
| **Increase the efficacy and/or delivery of the medicine in use.** |

**Figure S1. Role of excipients:** The figure indicates different roles of excipients in manufacturing and formulation [25]


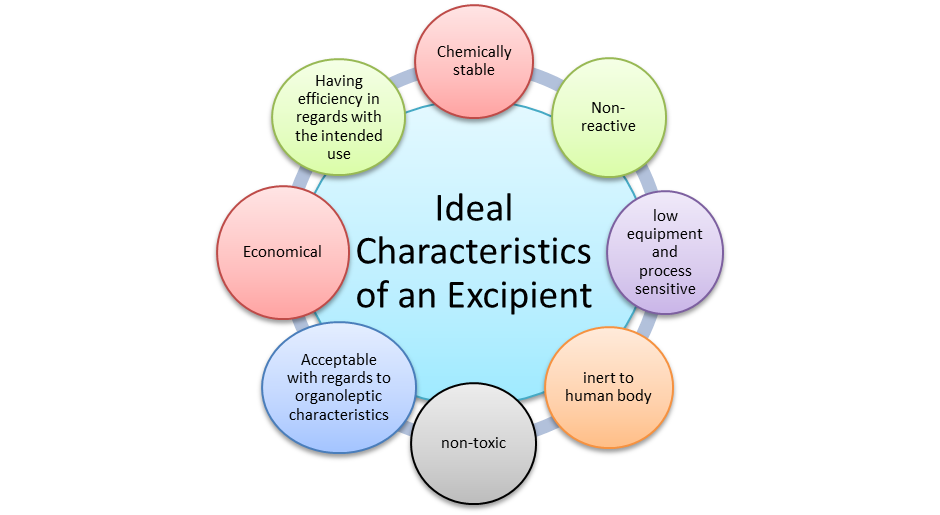


**Figure S2. Ideal Properties:** The following figure shows ideal properties of excipients in the formulation [27]

| **SOLID DOSAGE FORMS** | **LIQUID DOSGE FORMS** | **SEMI-SOLID DOSAGE FORMS** | **NANO-FORMULATIONS** |
| --- | --- | --- | --- |
| - **Anti-adherents** - **Binders** - **Coating Agents** - **Disintegrants** - **Fillers** - **Lubricants** - **Glidants** - **Preservatives** - **Organoleptic Additives As Colours, Flavours, Sweeteners** | - **Solvents** - **Co-Solvents** - **Buffers** - **Preservatives** - **Wetting Agents** - **Surfactants** - **Anti-Foaming Agents** - **Thickening Agents** - **Plasticizers** | - **Bases/ Structure Forming Agents** - **Preservatives** - **Antioxidants** - **Solubilizers** - **Gelling Agents** - **Emollients** - **Penetration Enhancers** | - **Polymers** - **Lipids** - **Cross-linkers** - **Gelling Agents** - **Mucoadhesive Agents** - **Cryoprotectants** - **Preservatives** - **Stabilizers** |

**Figure S3. Classification of excipients:** Excipients play a pivotal role in the development and design of dosage form. These are used to enhance organoleptic properties and also the formulation of conventional and novel dosage forms.
